# Supplementary material
Source: publisher figshare collection journal article supplement (https://geolsoc.figshare.com/ndownloader/files/5424425)
Supplement: Supplementary file 1 [file 5424425]

Table B1. Estimated model and parameters of paleo TS outputs (n=30, fascicle density)
window_no.	start_slide_no.	start_depth_m	start_age_years	end_slide_no.	end_depth_m	end_age_years	mid_depth_m	mid_age_years	best_model	logL	K	AICc	Akaike.wt	mstep	vstep	theta1	theta2	omega	shift1	shift2	ESD_1000years	ESD_1000years*
1	393-b	157.12	238366.07	319-a	128.68	193431.83	142.90	215898.95	Punc-1	11.364082	4	-13.128164	0.932			3.15574643	2.48635842	0.01755706	26		0.03511412
2	391-a	156.28	237039.98	315-b	127.74	191950.34	142.01	214495.16	Punc-1	11.357094	4	-13.114189	0.924			3.14356454	2.44190705	0.01805238	25		0.03610476
3	389-c	156.03	236653.21	313-c	127.13	190986.83	141.58	213820.02	Punc-1	10.779345	4	-11.95869	0.893			3.1357611	2.4072512	0.0200228	24		0.0400456
4	389-a	155.54	235879.66	313-a	126.70	190302.05	141.12	213090.86	Punc-1	9.72599	4	-9.85198	0.706			3.13297514	2.37644561	0.02253499	23		0.04506998
5	387-a	154.77	234664.08	311-b	126.30	189669.95	140.54	212167.01	Punc-1	9.535053	4	-9.470106	0.479			3.12407024	2.35409758	0.02318136	22		0.04636272
6	385-c	154.32	233945.78	309-d	125.90	189037.85	140.11	211491.82	SGS	17.271906	7	-15.452902	0.921	-5.96E-05	4.43E-05	3.02E+00	2.22E+00	0.00E+00	12	25	0	4.79E-02
7	385-a	153.90	233282.74	309-b	125.40	188247.72	139.65	210765.23	SGS	17.182228	7	-15.273547	0.868	-5.97E-05	4.41E-05	3.02E+00	2.22E+00	0.00E+00	11	24	0	4.77E-02
8	381-a	152.27	230708.72	307-c	124.93	187510.27	138.60	209109.49	SGS	17.998512	7	-16.906114	0.909	-5.95E-05	4.45E-05	3.03E+00	2.22E+00	0.00E+00	10	23	0	4.80E-02
9	367-b	147.50	223171.33	307-a	124.63	187036.19	136.07	205103.76	SGS	21.950476	7	-24.81004	0.982	-5.94E-05	4.46E-05	3.05E+00	2.23E+00	0.00E+00	9	22	0	4.81E-02
10	353-b	142.50	215270.06	305-c	124.27	186456.77	133.38	200863.41	Punc-1	11.855173	4	-14.11035	0.49			3.1554547	2.33847219	0.02024982	17		0.04049964
11	353-a	142.25	214874.99	305-a	123.77	185666.64	133.01	200270.82	Punc-1	12.386105	4	-15.17221	0.768			3.16636793	2.33744004	0.01941417	16		0.03882834
12	351-d	142.00	214479.93	301-c	122.73	184033.71	132.37	199256.82	Punc-1	12.241464	4	-14.882928	0.678			3.16245508	2.34283772	0.01969613	15		0.03939226
13	351-c	141.75	214084.87	301-a	122.23	183240.76	131.99	198662.81	Punc-1	12.694859	4	-15.78972	0.72			3.17264015	2.34664856	0.01884579	14		0.03769158
14	347-c	140.11	211488.74	299-b	121.53	182127.16	130.82	196807.95	Punc-1	14.595834	4	-19.59167	0.825			3.19358366	2.3432096	0.01664688	13		0.03329376
15	347-a	139.61	210698.61	295-d	120.49	180483.27	130.05	195590.94	Punc-1	14.608331	4	-19.61666	0.813			3.20198286	2.34853505	0.01658434	12		0.03316868
16	345-a	139.11	209908.48	295-b	120.08	179846.92	129.60	194877.70	Punc-1	15.102051	4	-20.6041	0.77			3.21252019	2.34725339	0.01603971	11		0.03207942
17	343-b	138.29	208610.42	293-b	119.55	178998.47	128.92	193804.44	Punc-1	15.823918	4	-22.04784	0.496			3.22826969	2.35136012	0.01537577	10		0.03075154
18	341-b	137.71	207707.42	291-b	118.84	177884.86	128.28	192796.14	Punc-1	16.5951	4	-23.5902	0.532			3.21077154	2.35655045	0.01479637	9		0.02959274
19	337-a	136.06	205096.53	289-b	118.00	176559.15	127.03	190827.84	Punc-1	15.29307	4	-20.98615	0.379			3.21679632	2.3674065	0.01644189	8		0.03288378
20	335-c	135.57	204321.90	287-d	117.50	175763.72	126.54	190042.81	SGS	22.2105	7	-25.33009	0.44	-8.76E-05	1.66E-05	3.25E+00	2.42E+00	3.30E-03	5	19	0.00660628	2.43E-02
21	335-a	135.11	203598.90	287-b	117.12	175164.31	126.12	189381.61	URW	12.091796	1	-22.04073	0.453		1.70E-05							1.70E-02
22	331-c	134.10	201997.99	285-c	116.71	174510.41	125.40	188254.20	SGS	20.178104	7	-21.2653	0.348	-3.10E-05	0.00E+00	3.00E+00	2.46E+00	2.20E-02	6	18	0.04400728	9.61E-04
23	331-a	133.68	201326.64	285-a	116.22	173747.53	124.95	187537.09	SGS	20.717472	7	-22.34404	0.462	-3.10E-05	0.00E+00	2.97E+00	2.47E+00	2.06E-02	5	17	0.04122906	9.61E-04
24	329-a	133.15	200500.37	279-a	113.67	169715.16	123.41	185107.76	SGS	22.689785	7	-26.28866	0.846	-3.10E-05	0.00E+00	2.87E+00	2.47E+00	1.56E-02	4	16	0.03126264	9.61E-04
25	327-c	132.70	199777.38	277-a	113.16	168897.79	122.93	184337.58	SGS	23.003213	7	-26.915518	0.872	-4.12E-05	0.00E+00	2.76E+00	2.48E+00	1.52E-02	4	15	0.03038728	1.70E-03
26	327-a	132.26	199083.43	275-b	112.50	167862.45	122.38	183472.94	SGS	27.5673	7	-36.04369	0.947	-3.24E-05	0.00E+00	2.57E+00	2.49E+00	7.25E-03	4	14	0.014499132	1.05E-03
27	325-a	131.63	198095.77	273-a	111.74	166654.61	121.68	182375.19	URW	18.89182	1	-35.64078	0.701		4.03E-06							4.03E-03
28	323-c	131.18	197382.47	269-a	110.68	164993.84	120.93	181188.15	URW	18.950116	1	-35.75738	0.635		3.42E-06							3.42E-03
29	323-a	130.73	196669.16	263-d	109.47	163081.43	120.10	179875.29	URW	19.398687	1	-36.654517	0.65		2.09E-06							2.09E-03
30	321-c	130.17	195791.24	261-b	108.61	161722.61	119.39	178756.93	Punc-1	18.766915	4	-27.93383	0.582			2.30460514	2.59347107	0.00931409	18		0.01862818
31	319-c	129.20	194254.88	259-c	107.50	159961.18	118.35	177108.03	URW	12.8939	1	-23.644942	0.53		1.21E-05							1.21E-02
32	319-a	128.68	193431.83	259-a	106.94	159076.71	117.81	176254.27	URW	11.2628388	1	-20.38282	0.641		1.46E-05							1.46E-02
33	315-b	127.74	191950.34	251-c	105.22	156364.34	116.48	174157.34	URW	9.853243	1	-17.563629	0.616		1.69E-05							1.69E-02
34	313-c	127.13	190986.83	251-a	104.70	155538.83	115.92	173262.83	SGS	14.732027	7	-10.373145	0.494	-2.58E-05	2.27E-05	2.32E+00	1.27E+00	2.11E-03	13	30	0.004225856	2.33E-02
35	313-a	126.70	190302.05	249-b	103.84	154182.64	115.27	172242.35	SGS	16.572076	7	-14.053243	0.87	-3.06E-05	2.31E-05	2.34E+00	1.24E+00	2.91E-04	13	29	0.000581395	2.40E-02
36	311-b	126.30	189669.95	245-c	103.10	153003.35	114.70	171336.65	SGS	14.8711116	7	-10.651314	0.68	-3.06E-05	2.31E-05	2.36E+00	1.16E+00	2.88E-03	12	28	0.005755286	2.40E-02
37	309-d	125.90	189037.85	245-a	102.50	152059.92	114.20	170548.88	SGS	15.775274	7	-12.459639	0.922	-3.38E-05	2.48E-05	2.37E+00	1.18E+00	2.54E-03	12	27	0.00507042	2.59E-02
38	309-b	125.40	188247.72	243-b	101.83	151003.06	113.62	169625.39	SGS	17.203169	7	-15.315429	0.979	-3.30E-05	2.47E-05	2.40E+00	1.20E+00	1.04E-03	11	26	0.002076414	2.58E-02
39	307-c	124.93	187510.27	241-d	101.16	149946.20	113.05	168728.24	SGS	15.15911	7	-11.227311	0.956	-8.38E-05	3.00E-05	2.48E+00	1.16E+00	7.37E-03	17	25	0.014741884	3.70E-02
40	307-a	124.63	187036.19	241-b	100.78	149342.28	112.71	168189.24	SGS	15.0275695	7	-10.96423	0.845	-5.53E-05	2.92E-05	2.39E+00	8.61E-01	0.00E+00	9	29	0	3.23E-02
41	305-c	124.27	186456.77	239-a	99.70	147631.18	111.98	167043.97	SGS	14.093925	7	-9.096941	0.601	-5.51E-05	2.94E-05	2.40E+00	9.08E-01	0.00E+00	8	28	0	3.25E-02
42	305-a	123.77	185666.64	235-c	99.06	146624.65	111.41	166145.64	SGS	13.2683833	7	-7.445858	0.502	-8.39E-05	3.50E-05	2.50E+00	1.12E+00	1.11E-02	15	22	0.02220084	4.20E-02
43	301-c	122.73	184033.71	235-a	98.52	145769.10	110.63	164901.40	URW	4.490028	1	-6.837199	0.423		2.82E-05							2.82E-02
44	301-a	122.23	183240.76	231-c	97.12	143563.35	109.68	163402.05	SGS	14.5077919	7	-9.924675	0.705	-9.72E-05	3.44E-05	2.52E+00	1.29E+00	2.50E-03	13	28	0.004998212	4.38E-02
45	299-b	121.53	182127.16	231-a	96.54	142643.34	109.03	162385.25	SGS	13.932624	7	-8.774338	0.601	-9.72E-05	3.43E-05	2.53E+00	1.33E+00	3.21E-03	12	27	0.006414746	4.37E-02
46	295-d	120.49	180483.27	229-b	95.48	140965.67	107.98	160724.47	SGS	16.9296536	7	-14.768398	0.968	-9.71E-05	3.44E-05	2.55E+00	1.32E+00	2.78E-04	11	26	0.000555003	4.38E-02
47	295-b	120.08	179846.92	225-c	94.73	139775.07	107.40	159811.00	SGS	17.1430371	7	-15.195165	0.977	-9.69E-05	3.45E-05	2.57E+00	1.30E+00	2.28E-04	10	25	0.000455561	4.39E-02
48	293-b	119.55	178998.47	223-c	93.63	138043.28	106.59	158520.87	SGS	18.1461407	7	-17.201372	0.993	-9.71E-05	3.44E-05	2.58E+00	1.29E+00	0.00E+00	9	24	0	4.38E-02
49	291-b	118.84	177884.86	219-c	92.50	136257.38	105.67	157071.12	SGS	16.8082275	7	-14.525546	0.978	-9.71E-05	3.44E-05	2.58E+00	1.31E+00	4.76E-04	8	23	0.000951412	4.38E-02
50	289-b	118.00	176559.15	219-a	91.96	135408.92	104.98	155984.04	SGS	15.7279455	7	-12.364982	0.942	-9.66E-05	3.48E-05	2.59E+00	1.33E+00	1.66E-03	7	22	0.0033116	4.41E-02
51	287-d	117.50	175763.72	215-c	91.33	134401.38	104.41	155082.55	SGS	15.9129711	7	-12.735033	0.957	-9.58E-05	3.53E-05	2.58E+00	1.32E+00	1.72E-03	6	21	0.003432512	4.45E-02
52	287-b	117.12	175164.31	215-a	90.82	133605.95	103.97	154385.13	SGS	15.9356489	7	-12.780389	0.958	-9.53E-05	3.57E-05	2.57E+00	1.32E+00	1.88E-03	5	20	0.00375991	4.48E-02
53	285-c	116.71	174510.41	213-b	90.08	132439.32	103.40	153474.87	SGS	15.9069546	7	-12.723	0.961	-1.10E-04	3.28E-05	2.64E+00	1.33E+00	2.71E-03	5	19	0.005415626	4.50E-02
54	285-a	116.22	173747.53	211-c	89.48	131484.80	102.85	152616.17	SGS	17.314289	7	-15.53767	0.991	-1.22E-04	3.68E-05	2.74E+00	1.33E+00	2.85E-03	6	18	0.005706856	5.18E-02
55	279-a	113.67	169715.16	211-a	89.18	131007.54	101.43	150361.35	SGS	16.927299	7	-14.763689	0.975	-1.22E-04	3.72E-05	2.76E+00	1.34E+00	3.71E-03	5	17	0.007427408	5.21E-02
56	277-a	113.16	168897.79	207-c	88.71	130265.14	100.93	149581.47	SGS	18.525494	7	-17.960079	0.994	-1.22E-04	3.73E-05	2.83E+00	1.35E+00	2.59E-03	4	16	0.005176598	5.21E-02
57	275-b	112.50	167862.45	207-a	88.20	129023.66	100.35	148443.06	SGS	18.5195126	7	-17.948116	0.988	-1.21E-04	3.79E-05	2.82E+00	1.34E+00	2.98E-03	3	15	0.005966324	5.26E-02
58	273-a	111.74	166654.61	205-a	87.84	128860.94	99.79	147757.78	SGS	13.123159	7	-7.155408	0.41	-1.02E-04	3.90E-05	2.65E+00	1.36E+00	1.06E-02	3	14	0.02124162	4.94E-02
59	269-a	110.68	164993.84	203-c	87.50	128318.53	99.09	146656.19	SGS	17.737085	7	-16.383261	0.933	-8.95E-05	4.28E-05	2.18E+00	1.35E+00	5.66E-03	3	13	0.011329148	5.08E-02
60	263-d	109.47	163081.43	203-a	87.11	127688.78	98.29	145385.10	SGS	19.974825	7	-20.858741	0.945	-1.07E-04	3.63E-05	1.92E+00	1.35E+00	5.94E-03	4	12	0.011885826	4.78E-02
61	261-b	108.61	161722.61	201-c	86.66	126954.06	97.64	144338.34	SGS	21.114664	7	-23.138419	0.976	-1.07E-04	3.67E-05	1.85E+00	1.35E+00	5.15E-03	3	11	0.010296568	4.81E-02
62	259-c	107.50	159961.18	201-b	86.40	126534.22	96.95	143247.70	URW	7.972618	1	-13.802378	0.607		2.53E-05							2.53E-02
63	259-a	106.94	159076.71	199-c	85.49	125064.79	96.21	142070.75	Punc-1	23.558168	4	-37.51634	0.818			1.101860686	1.347929636	0.008204933	9		0.016409866
64	251-c	105.22	156364.34	199-a	84.84	124015.19	95.03	140189.76	Punc-1	21.9854	4	-34.3708	0.913			1.075029196	1.335975966	0.009897102	8		0.019794204
65	251-a	104.70	155538.83	197-a	84.38	123280.47	94.54	139409.65	Punc-1	19.88784	4	-30.17568	0.872			1.04921638	1.32367373	0.01204255	7		0.0240851
66	249-b	103.84	154182.64	195-c	83.18	121338.72	93.51	137760.68	URW	14.58558	1	-27.02831	0.504		1.34E-05							1.34E-02
67	245-c	103.10	153003.35	195-a	82.86	120813.92	92.98	136908.64	URW	15.55386	1	-28.96487	0.673		1.14E-05							1.14E-02
68	245-a	102.50	152059.92	193-a	82.22	119784.51	92.36	135922.21	SGS	24.278726	7	-29.46654	0.535	2.29E-05	9.20E-06	9.38E-01	1.03E+00	0.00E+00	4	26	0	9.72E-03
69	243-b	101.83	151003.06	191-c	81.03	117862.94	91.43	134433.00	URW	18.28861	1	-34.43436	0.617		8.97E-06							8.97E-03
70	241-d	101.16	149946.20	191-a	80.51	117015.19	90.83	133480.70	Punc-1	29.01262	4	-48.42523	0.984			1.338040817	1.037880479	0.004712576	24		0.009425152
71	241-b	100.78	149342.28	189-b	79.77	115828.34	90.28	132585.31	Punc-1	33.70774	4	-57.81548	0.986			1.347922603	1.04340299	0.003006085	23		0.00601217
72	239-a	99.70	147631.18	187-c	79.04	114641.49	89.37	131136.34	Punc-1	34.10793	4	-58.61586	0.985			1.352645844	1.034739286	0.002841852	22		0.005683704
73	235-c	99.06	146624.65	187-a	78.55	113850.26	88.80	130237.45	Punc-1	34.2258	4	-58.8516	0.985			1.354901982	1.037571261	0.002836332	21		0.005672664
74	235-a	98.52	145769.10	185-c	78.06	113059.03	88.29	129414.06	Punc-1	33.69369	4	-57.78738	0.984			1.357062702	1.04623157	0.003119966	20		0.006239932
75	231-c	97.12	143563.35	185-a	77.50	112154.76	87.31	127859.05	Punc-1	34.08944	4	-58.57888	0.985			1.352531907	1.050289543	0.002998707	19		0.005997414
76	231-a	96.54	142643.34	183-b	76.39	110364.47	86.47	126503.90	Punc-1	34.56356	4	-59.52712	0.984			1.357114665	1.052462243	0.002905826	18		0.005811652
77	229-b	95.48	140965.67	181-c	75.51	108932.23	85.49	124948.95	Punc-1	36.997692	4	-64.39538	0.98			1.36732213	1.0490332	0.00209093	17		0.00418186
78	225-c	94.73	139775.07	177-d	73.64	104168.24	84.18	121971.65	Punc-1	37.437342	4	-65.27468	0.975			1.372802156	1.045307242	0.002019699	16		0.004039398
79	223-c	93.63	138043.28	177-b	73.16	102556.10	83.40	120299.69	Punc-1	37.533542	4	-65.46708	0.977			1.368813	1.04211401	0.00211617	15		0.00423234
80	219-c	92.50	136257.38	175-c	72.25	99456.06	82.38	117856.72	Punc-1	35.788822	4	-61.97764	0.979			1.36120315	1.031945454	0.002798927	14		0.005597854
81	219-a	91.96	135408.92	175-a	71.68	97529.12	81.82	116469.02	Punc-1	34.731571	4	-59.86314	0.964			1.37479993	1.020424726	0.003289332	13		0.006578664
82	215-c	91.33	134401.38	173-c	70.80	94738.56	81.06	114569.97	Punc-1	33.899687	4	-58.19937	0.959			1.3747283	1.0150491	0.0036257	12		0.0072514
83	215-a	90.82	133605.95	173-b	70.16	93562.07	80.49	113584.01	Punc-1	34.024457	4	-58.44891	0.963			1.370745316	1.014278492	0.003593221	11		0.007186442
84	213-b	90.08	132439.32	171-d	69.88	93039.19	79.98	112739.25	Punc-1	33.23474	4	-56.86948	0.959			1.369088056	1.009381268	0.003996512	10		0.007993024
85	211-c	89.48	131484.80	171-b	69.63	92581.66	79.55	112033.23	Punc-1	34.05903	4	-58.51805	0.97			1.356920685	1.010310154	0.003658461	9		0.007316922
86	211-a	89.18	131007.54	169-d	68.95	91339.81	79.07	111173.68	Punc-1	34.16761	4	-58.73522	0.973			1.350653442	1.008989255	0.003590713	8		0.007181426
87	207-c	88.71	130265.14	169-b	68.42	90359.41	78.57	110312.27	Punc-1	34.63923	4	-59.67846	0.958			1.365405914	1.006456309	0.003413179	7		0.006826358
88	207-a	88.20	129023.66	167-a	67.85	89313.64	78.03	109168.65	Punc-1	37.0114	4	-64.42279	0.976			1.33613218	1.00602723	0.00254746	6		0.00509492
89	205-a	87.84	128860.94	165-c	67.50	88660.03	77.67	108760.49	Punc-1	36.27666	4	-62.95331	0.777			1.347086653	1.002129844	0.002897955	5		0.00579591
90	203-c	87.50	128318.53	165-a	67.15	88015.57	77.33	108167.05	Punc-1	36.46766	4	-63.33531	0.837			1.333941826	1.00246721	0.002849738	4		0.005699476
91	203-a	87.11	127688.78	163-b	66.31	86791.42	76.71	107240.10	Punc-1	33.90719	4	-58.21438	0.892			1.304972213	0.995787678	0.003862729	3		0.007725458
92	201-c	86.66	126954.06	159-d	65.65	85949.98	76.15	106452.02	Punc-1	36.71227	4	-63.82454	0.961			1.06856488	0.94461133	0.00288732	15		0.00577464
93	201-b	86.40	126534.22	159-b	65.09	85241.40	75.74	105887.81	Punc-1	42.69961	4	-75.79923	0.951			1.042146642	0.933212651	0.001310875	17		0.00262175
94	199-c	85.49	125064.79	155-d	64.46	84444.25	74.97	104754.52	Punc-1	42.17156	4	-74.74312	0.962			1.040078822	0.928492411	0.001523318	16		0.003046636
95	199-a	84.84	124015.19	155-b	63.93	83779.95	74.39	103897.57	Punc-1	41.57708	4	-73.55416	0.954			1.040012869	0.932710079	0.001699108	15		0.003398216
96	197-a	84.38	123280.47	153-d	63.27	82938.51	73.83	103109.49	Punc-1	41.19739	4	-72.79479	0.962			1.03939311	0.92949066	0.00182174	14		0.00364348
97	195-c	83.18	121338.72	153-b	62.74	82274.22	72.96	101806.47	Punc-1	41.55958	4	-73.51916	0.953			1.035222724	0.929193686	0.001787777	13		0.003575554
98	195-a	82.86	120813.92	151-a	62.12	81483.79	72.49	101148.85	Punc-1	41.85849	4	-74.11698	0.957			1.03953435	0.9301077	0.00174888	12		0.00349776
99	193-a	82.22	119784.51	147-d	61.71	80959.68	71.96	100372.10	Punc-1	41.32957	4	-73.05914	0.955			1.03523126	0.92616251	0.00189639	11		0.00379278
100	191-c	81.03	117862.94	147-b	61.22	80348.23	71.13	99105.58	Punc-1	42.22103	4	-74.84206	0.965			1.04546323	0.92882893	0.00169568	10		0.00339136
101	191-a	80.51	117015.19	143-d	60.64	79605.74	70.57	98310.47	Punc-1	41.0532	4	-72.50639	0.946			1.04089189	0.933486981	0.001987302	9		0.003974604
102	189-b	79.77	115828.34	143-b	60.16	78994.29	69.96	97411.32	Punc-1	41.85894	4	-74.11789	0.954			1.092339298	0.943994267	0.001820965	5		0.00364193
103	187-c	79.04	114641.49	139-b	59.09	77640.35	69.06	96140.92	Punc-1	40.20614	4	-70.81228	0.938			1.102096951	0.948410534	0.002213902	4		0.004427804
104	187-a	78.55	113850.26	135-d	58.53	76941.54	68.54	95395.90	Punc-1	39.31137	4	-69.02275	0.701			1.086729115	0.951824671	0.002461479	3		0.004922958
105	185-c	78.06	113059.03	135-b	58.02	76286.41	68.04	94672.72	Stasis	37.07584	2	-69.70724	0.618			0.95375498		0.003178276			0.006356552
106	185-a	77.50	112154.76	131-d	57.50	75631.28	67.50	93893.02	Stasis	38.78999	2	-73.13553	0.51			0.949781538		0.002669513			0.005339026
107	183-b	76.39	110364.47	131-b	57.02	75028.14	66.71	92696.30	Stasis	37.77439	2	-71.10433	0.702			0.944128457		0.003007253			0.006014506
108	181-c	75.51	108932.23	129-d	56.45	74295.76	65.98	91614.00	Stasis	38.02874	2	-71.61303	0.704			0.94279664		0.00292537			0.00585074
109	177-d	73.64	104168.24	129-b	56.00	73735.71	64.82	88951.97	Stasis	37.67546	2	-70.90648	0.557			0.938354163		0.003042546			0.006085092
110	177-b	73.16	102556.10	127-d	55.77	73434.14	64.46	87995.12	Stasis	38.17215	2	-71.89986	0.718			0.941413453		0.002884307			0.005768614
111	175-c	72.25	99456.06	127-b	55.29	72831.00	63.77	86143.53	Stasis	38.13816	2	-71.83187	0.502			0.941369345		0.002860878			0.005721756
112	175-a	71.68	97529.12	123-d	54.27	71538.56	62.98	84533.84	Punc-1	39.82594	4	-70.05188	0.666			0.946416996	0.807425231	0.002364919	29		0.004729838
113	173-c	70.80	94738.56	123-b	53.62	70720.02	62.21	82729.29	Punc-1	39.63437	4	-69.66874	0.53			0.951736537	0.874963029	0.002389454	24		0.004778908
114	173-b	70.16	93562.07	121-d	53.25	70246.13	61.70	81904.10	Punc-1	38.71154	4	-67.82307	0.432			0.956805059	0.895019163	0.002646114	21		0.005292228
115	171-d	69.88	93039.19	121-b	52.74	69599.91	61.31	81319.55	Stasis	36.96861	2	-69.49278	0.464			0.933014724		0.003153222			0.006306444
116	171-b	69.63	92581.66	119-c	50.61	66907.76	60.12	79744.71	Stasis	36.86285	2	-69.28126	0.402			0.929439065		0.003217122			0.006434244
117	169-d	68.95	91339.81	117-d	50.41	66656.12	59.68	78997.97	Stasis	35.71286	2	-66.98128	0.676			0.932558908		0.003636814			0.007273628
118	169-b	68.42	90359.41	117-b	49.95	66068.96	59.19	78214.18	Stasis	35.81833	2	-67.19222	0.631			0.928526026		0.003636312			0.007272624
119	167-a	67.85	89313.64	115-d	49.42	65397.92	58.64	77355.78	Stasis	35.71298	2	-66.98152	0.582			0.927939451		0.003690744			0.007381488
120	165-c	67.50	88660.03	115-b	48.96	64810.76	58.23	76735.40	Stasis	35.55349	2	-66.66254	0.703			0.928267755		0.003742048			0.007484096
121	165-a	67.15	88015.57	113-d	48.43	64139.72	57.79	76077.65	Stasis	36.51147	2	-68.5785	0.694			0.934029476		0.003394346			0.006788692
122	163-b	66.31	86791.42	113-b	48.03	63636.44	57.17	75213.93	Stasis	35.58878	2	-66.73311	0.618			0.931304839		0.003706403			0.007412806
123	159-d	65.65	85949.98	111-d	47.50	62965.40	56.57	74457.69	Stasis	35.52606	2	-66.60767	0.598			0.929899953		0.003688652			0.007377304
124	159-b	65.09	85241.40	111-b	47.13	62491.51	56.11	73866.46	Punc-1	37.90814	4	-66.21629	0.516			0.973146929	0.906733508	0.002887113	11		0.005774226
125	155-d	64.46	84444.25	107-d	46.48	61672.97	55.47	73058.61	Punc-1	37.80032	4	-66.00064	0.447			0.970607752	0.904786367	0.002900676	10		0.005801352
126	155-b	63.93	83779.95	107-b	45.97	61026.75	54.95	72403.35	Punc-1	38.86942	4	-68.13884	0.661			0.982164483	0.904779758	0.002602288	9		0.005204576
127	153-d	63.27	82938.51	105-b	44.98	59777.40	54.13	71357.95	Punc-1	39.12645	4	-68.65289	0.772			0.990450065	0.902995264	0.002522321	8		0.005044642
128	153-b	62.74	82274.22	103-d	44.44	59088.10	53.59	70681.16	Punc-1	39.38133	4	-69.16266	0.813			0.997767863	0.902639165	0.002427432	7		0.004854864
129	151-a	62.12	81483.79	103-b	43.96	58484.96	53.04	69984.37	Punc-1	42.70606	4	-75.81212	0.984			1.02707645	0.90174879	0.00160818	6		0.00321636
130	147-d	61.71	80959.68	97-d	42.50	56632.47	52.10	68796.07	Punc-1	42.67095	4	-75.7419	0.986			1.03831145	0.89968418	0.00157732	5		0.00315464
131	147-b	61.22	80348.23	97-b	42.02	56021.01	51.62	68184.62	Punc-1	42.67027	4	-75.74053	0.975			1.040646309	0.900000158	0.001580314	4		0.003160628
132	143-d	60.64	79605.74	95-d	41.47	55322.20	51.05	67463.97	Punc-1	42.81789	4	-76.03579	0.944			1.053637671	0.900131263	0.001533815	3		0.00306763
133	143-b	60.16	78994.29	95-b	40.95	54667.07	50.55	66830.68	Punc-1	40.45274	4	-71.30548	0.529			0.923005933	0.865931528	0.002148162	19		0.004296324
134	139-b	59.09	77640.35	93-d	40.43	54011.94	49.76	65826.15	Stasis	39.94883	2	-75.45322	0.494			0.89370694		0.00234319			0.00468638
135	135-d	58.53	76941.54	93-b	39.93	53378.65	49.23	65160.10	Punc-1	42.616	4	-75.632	0.59			0.917936069	0.863023671	0.001700045	17		0.00340009
136	135-b	58.02	76286.41	85-c	37.74	50605.26	47.88	63445.83	Punc-1	42.0537	4	-74.5074	0.839			0.898506113	0.797719999	0.001843923	27		0.003687846
137	131-d	57.50	75631.28	85-a	37.23	49939.00	47.36	62785.14	Punc-1	41.18539	4	-72.77079	0.672			0.920914661	0.859610927	0.002056274	15		0.004112548
138	131-b	57.02	75028.14	83-c	36.76	49085.05	46.89	62056.60	Stasis	37.07016	2	-69.69588	0.619			0.889682511		0.003190595			0.00638119
139	129-d	56.45	74295.76	83-a	36.25	48170.10	46.35	61232.93	Stasis	37.15021	2	-69.85598	0.552			0.890464298		0.003180828			0.006361656
140	129-b	56.00	73735.71	81-c	35.79	47346.65	45.90	60541.18	Stasis	37.42265	2	-70.40086	0.691			0.889716148		0.003067396			0.006134792
141	127-d	55.77	73434.14	81-a	35.30	46462.20	45.53	59948.17	Punc-1	40.31856	4	-71.03712	0.503			0.929432094	0.871150982	0.002259214	11		0.004518428
142	127-b	55.29	72831.00	75-d	34.80	45547.25	45.04	59189.13	Punc-1	42.11756	4	-74.63511	0.762			0.944745461	0.875410288	0.001807399	10		0.003614798
143	123-d	54.27	71538.56	75-b	34.36	44754.29	44.31	58146.43	Punc-1	40.60976	4	-71.61951	0.831			0.950366936	0.870004458	0.002181744	9		0.004363488
144	123-b	53.62	70720.02	73-d	33.89	43900.34	43.75	57310.18	Punc-1	39.27164	4	-68.94329	0.733			0.945698245	0.865100637	0.002581644	8		0.005163288
145	121-d	53.25	70246.13	73-b	33.51	43229.38	43.38	56737.75	Punc-1	38.96922	4	-68.33844	0.645			0.947617462	0.867336962	0.002718793	7		0.005437586
146	121-b	52.74	69599.91	71-d	33.04	42375.43	42.89	55987.67	Punc-1	39.75326	4	-69.90652	0.805			0.962604774	0.866971879	0.002448828	6		0.004897656
147	119-c	50.61	66907.76	71-b	32.70	41765.46	41.66	54336.61	Stasis	37.90058	2	-71.35671	0.613			0.879663086		0.002995857			0.005991714
148	117-d	50.41	66656.12	69-d	32.28	41010.88	41.35	53833.50	Punc-1	40.67225	4	-71.7445	0.586			0.9654774	0.8688233	0.0022573	4		0.0045146
149	117-b	49.95	66068.96	69-b	31.87	40263.57	40.91	53166.27	Punc-1	41.89725	4	-74.1945	0.827			1.004656081	0.869104453	0.001957676	3		0.003915352
150	115-d	49.42	65397.92	67-a	30.91	38529.81	40.17	51963.87	Stasis	40.12879	2	-75.81314	0.864			0.872607471		0.002413599			0.004827198
151	115-b	48.96	64810.76	63-c	29.95	36796.06	39.45	50803.41	Punc-1	41.94706	4	-74.29412	0.736			0.868621028	1.042677827	0.001946116	30		0.003892232
152	113-d	48.43	64139.72	63-a	29.49	35959.07	38.96	50049.40	Stasis	38.4346	2	-72.42476	0.791			0.874902128		0.002913648			0.005827296
153	113-b	48.03	63636.44	61-c	29.01	35092.19	38.52	49364.32	Stasis	37.53685	2	-70.62925	0.597			0.877219466		0.003145121			0.006290242
154	111-d	47.50	62965.40	61-a	28.53	34225.31	38.01	48595.36	Stasis	37.71949	2	-70.99454	0.772			0.87803781		0.003132481			0.006264962
155	111-b	47.13	62491.51	59-c	28.00	33268.76	37.56	47880.14	Stasis	37.61523	2	-70.78601	0.758			0.87960478		0.003122432			0.006244864
156	107-d	46.48	61672.97	59-a	27.50	32371.99	36.99	47022.48	Stasis	36.01719	2	-67.58993	0.708			0.8743579		0.0036851			0.0073702
157	107-b	45.97	61026.75	57-c	26.99	31450.81	36.48	46238.78	Stasis	34.22697	2	-64.0095	0.68			0.879552994		0.004355594			0.008711188
158	105-b	44.98	59777.40	57-a	26.48	30529.64	35.73	45153.52	Stasis	34.04485	2	-63.64527	0.712			0.880707639		0.004426375			0.00885275
159	103-d	44.44	59088.10	55-b	26.00	29669.88	35.22	44378.99	Punc-1	35.1824	4	-60.76481	0.741			0.873790161	1.00480582	0.004000912	28		0.008001824
160	103-b	43.96	58484.96	51-d	25.43	28759.12	34.69	43622.04	Stasis	31.56986	2	-58.69527	0.577			0.887139025		0.005526498			0.011052996
161	97-d	42.50	56632.47	51-b	25.05	28230.15	33.78	42431.31	Stasis	31.44228	2	-58.44011	0.648			0.884790556		0.005634556			0.011269112
162	97-b	42.02	56021.01	49-d	24.54	27508.83	33.28	41764.92	Stasis	31.0763	2	-57.70815	0.538			0.881579981		0.005845841			0.011691682
163	95-d	41.47	55322.20	49-b	24.03	26787.51	32.75	41054.86	Stasis	31.88159	2	-59.31873	0.771			0.883636484		0.005462856			0.010925712
164	95-b	40.95	54667.07	47-d	23.52	26066.19	32.23	40366.63	Stasis	31.28535	2	-58.12625	0.72			0.881468139		0.005739919			0.011479838
165	93-d	40.43	54011.94	47-b	23.01	25344.87	31.72	39678.41	Stasis	29.81388	2	-55.18331	0.692			0.888117339		0.006449188			0.012898376
166	93-b	39.93	53378.65	45-d	22.50	24623.55	31.22	39001.10	Stasis	30.53914	2	-56.63383	0.801			0.889640141		0.006073982			0.012147964
167	85-c	37.74	50605.26	45-b	22.08	24034.47	29.91	37319.86	Stasis	30.64193	2	-56.83941	0.83			0.888598833		0.006031115			0.01206223
168	85-a	37.23	49939.00	41-a	21.49	23199.94	29.36	36569.47	Stasis	31.45797	2	-58.4715	0.86			0.885195123		0.005652191			0.011304382
169	83-c	36.76	49085.05	39-c	21.11	22659.95	28.93	35872.50	Stasis	31.2625	2	-58.08055	0.842			0.883399695		0.005800366			0.011600732
170	83-a	36.25	48170.10	39-a	20.59	21923.61	28.42	35046.85	Stasis	31.47545	2	-58.50645	0.838			0.881589266		0.005720481			0.011440962
171	81-c	35.79	47346.65	37-c	20.10	21236.35	27.95	34291.50	Stasis	31.39595	2	-58.34746	0.837			0.884308453		0.005781939			0.011563878
172	81-a	35.30	46462.20	37-a	19.58	20500.00	27.44	33481.10	Stasis	31.6191	2	-58.79375	0.523			0.879884276		0.005698498			0.011396996
173	75-d	34.80	45547.25	35-c	19.06	19585.41	26.93	32566.33	Stasis	31.89626	2	-59.34808	0.831			0.887823014		0.005571935			0.01114387
174	75-b	34.36	44754.29	33-c	18.02	17756.23	26.19	31255.26	Stasis	32.9361	2	-61.42775	0.789			0.890290668		0.005103358			0.010206716
175	73-d	33.89	43900.34	33-a	17.50	16841.64	25.69	30370.99	Stasis	32.98735	2	-61.53026	0.797			0.888859397		0.005092853			0.010185706
176	73-b	33.51	43229.38	27-d	16.61	15275.77	25.06	29252.57	Stasis	33.06144	2	-61.67843	0.774			0.890048416		0.005082782			0.010165564
177	71-d	33.04	42375.43	27-b	16.16	14492.83	24.60	28434.13	Stasis	33.29754	2	-62.15063	0.8			0.888016928		0.005084845			0.01016969
178	71-b	32.70	41765.46	25-d	15.68	13653.97	24.19	27709.72	Stasis	33.4605	2	-62.47655	0.74			0.889038415		0.005054947			0.010109894
179	69-d	32.28	41010.88	25-b	15.24	12871.04	23.76	26940.96	Stasis	33.24614	2	-62.04784	0.744			0.89128282		0.005149476			0.010298952
180	69-b	31.87	40263.57	23-d	14.73	11976.25	23.30	26119.91	Stasis	33.13793	2	-61.83142	0.71			0.894302135		0.005214934			0.010429868
181	67-a	30.91	38529.81	23-b	14.22	11081.47	22.57	24805.64	Stasis	34.84113	2	-65.23782	0.829			0.890732457		0.004546865			0.00909373
182	63-c	29.95	36796.06	21-c	13.55	10295.71	21.75	23545.88	Stasis	34.8678	2	-65.29116	0.788			0.893674234		0.004592732			0.009185464
183	63-a	29.49	35959.07	21-a	13.07	9798.26	21.28	22878.66	Stasis	35.37261	2	-66.30079	0.791			0.891756783		0.004437125			0.00887425
184	61-c	29.01	35092.19	17-d	12.22	8914.05	20.62	22003.12	Stasis	35.4869	2	-66.52935	0.783			0.892664543		0.004457926			0.008915852
185	61-a	28.53	34225.31	17-b	11.84	8519.06	20.19	21372.19	Stasis	35.37235	2	-66.30025	0.776			0.890575695		0.004503369			0.009006738
186	59-c	28.00	33268.76	15-b	10.81	7441.82	19.40	20355.29	Punc-1	42.19946	4	-74.79892	0.854			1.004804899	0.882083265	0.002550494	4		0.005100988
187	59-a	27.50	32371.99	13-d	10.33	6908.55	18.91	19640.27	Punc-1	42.12117	4	-74.64234	0.613			0.997404536	0.88100363	0.002575026	3		0.005150052
188	57-c	26.99	31450.81	13-b	9.78	6386.62	18.38	18918.72	Stasis	39.07958	2	-73.71472	0.673			0.88786249		0.00340216			0.00680432
189	57-a	26.48	30529.64	11-d	9.29	5929.93	17.89	18229.79	Punc-1	47.12351	4	-84.64702	0.624			0.821010947	0.895757422	0.001646567	6		0.003293134
190	55-b	26.00	29669.88	11-b	8.74	5408.01	17.37	17538.94	Punc-1	47.13558	4	-84.67116	0.651			0.812374747	0.897242715	0.001681966	5		0.003363932
191	51-d	25.43	28759.12	9-d	8.22	4918.70	16.82	16838.91	Punc-1	47.18196	4	-84.76392	0.639			0.803913193	0.898186359	0.001683379	4		0.003366758
192	51-b	25.05	28230.15	9-b	7.74	4462.01	16.40	16346.08	Punc-1	46.61886	4	-83.63772	0.532			0.802198366	0.900148371	0.001774853	3		0.003549706
193	49-d	24.54	27508.83	7-a	6.33	3130.00	15.44	15319.42	Stasis	44.44124	2	-84.43804	0.629			0.89609265		0.002185482			0.004370964
194	49-b	24.03	26787.51	5-c	5.67	2499.34	14.85	14643.42	Stasis	46.42491	2	-88.40537	0.721			0.901290572		0.001846057			0.003692114
195	47-d	23.52	26066.19	5-a	4.92	1789.84	14.22	13928.01	Punc-1	53.27911	4	-96.95822	0.469			0.864880777	0.907165804	0.000878699	8		0.001757398
196	47-b	23.01	25344.87	3-c	4.25	1159.17	13.63	13252.02	Stasis	54.1584	2	-103.87235	0.567			0.90129293		0.000831061			0.001662122
197	45-d	22.50	24623.55	3-a	3.58	528.51	13.04	12576.03	Stasis	52.95941	2	-101.47438	0.744			0.899253595		0.000986517			0.001973034
198	45-b	22.08	24034.47	1-a	2.50	-496.32	12.29	11769.07	Stasis	52.80431	2	-101.16419	0.759			0.89860575		0.00100652			0.00201304
